# Supplementary material
Source: Springer Nature journal article supplement (https://www.springermedizin.de/resource/supplementary/12957_2011_859_MOESM3_ESM.pdf/9565652)

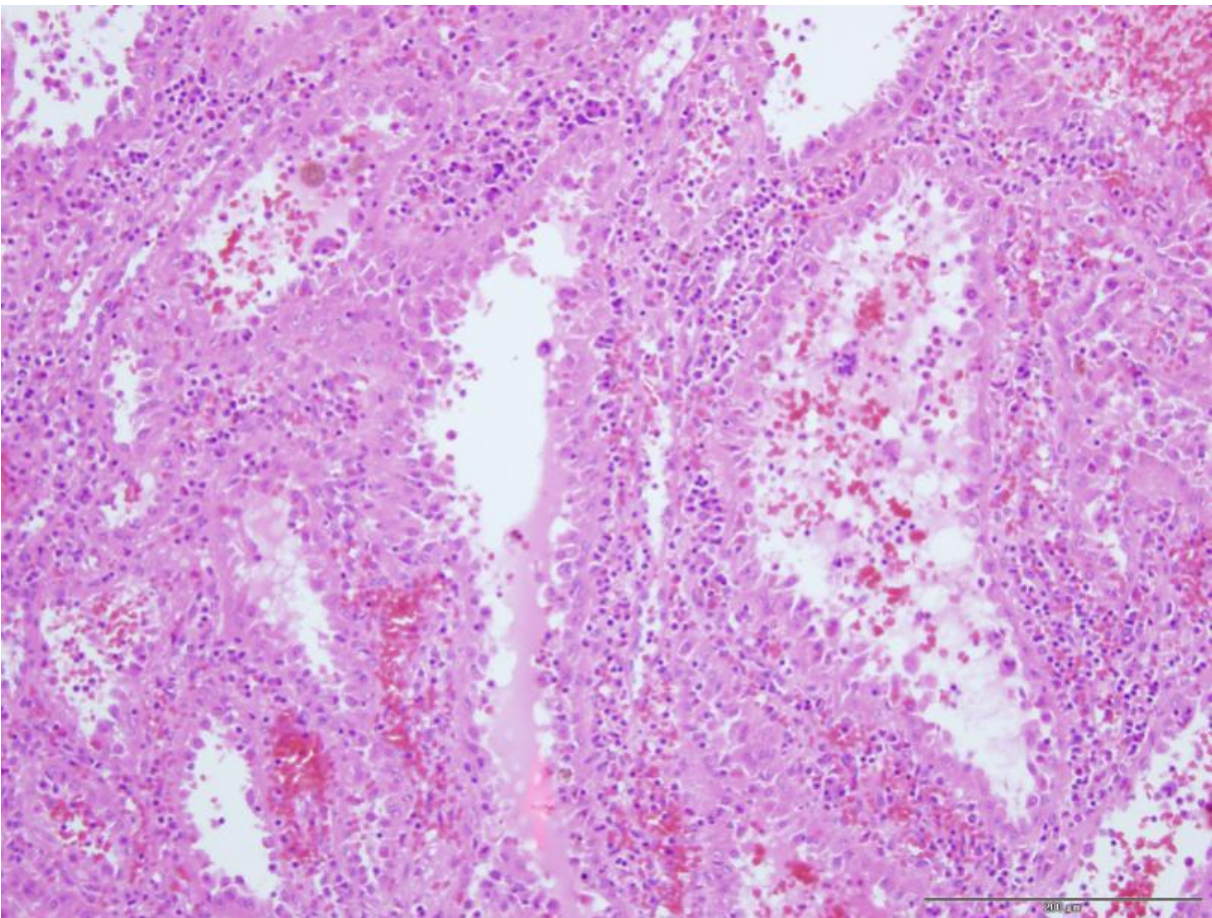

200  $\mu$ m

Supplement: MOESM3 [file 9565652]
